# Supplementary material for: Role of 5-HT1A Receptor Stimulation in the Medial Prefrontal Cortex in the Sustained Antidepressant Effects of Ketamine
Source: PubMed Central journal article supplement — Int J Neuropsychopharmacol. 2017 Dec 22;21(4):371–81. doi: 10.1093/ijnp/pyx116 (PMC5888010; doi:10.1093/ijnp/pyx116), 2017-12-22
Supplement: pyx116_suppl_supplemental_figures.pdf [file pyx116_suppl_supplemental_figures.pdf]

Figure S1

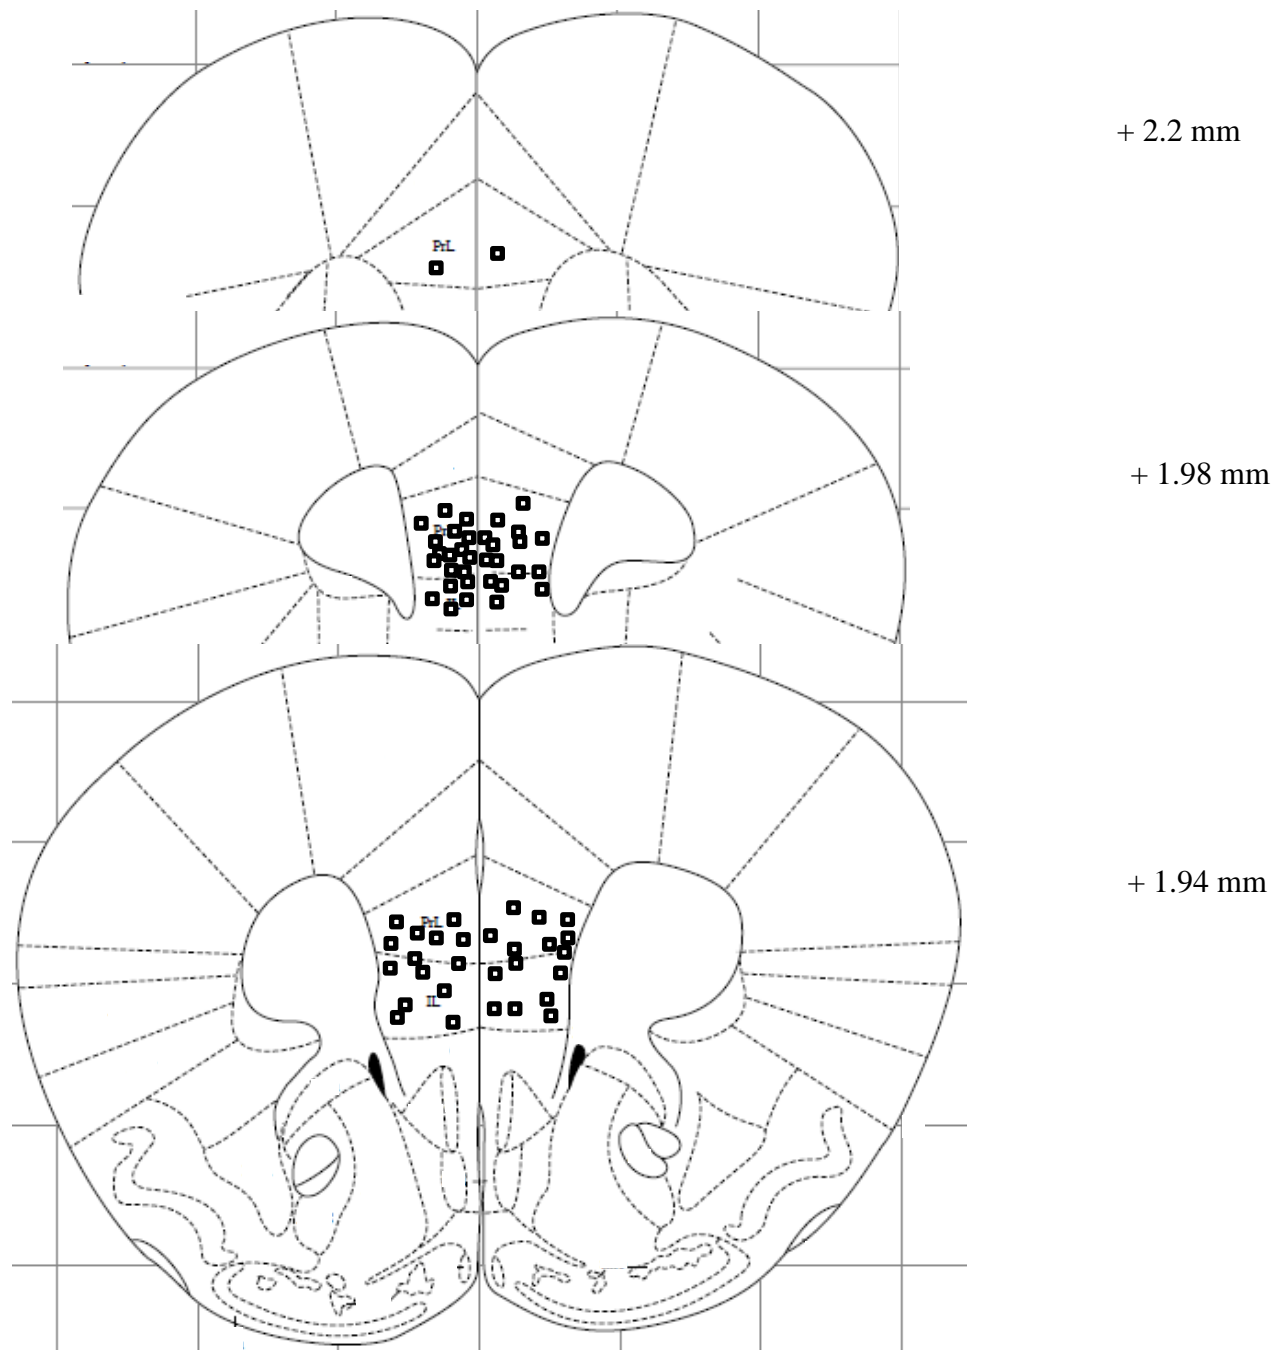

**Location of the microinjection cannula tips in the mPFC included in the analyses of the data illustrated in Fig. 1E.**

The line drawings are from Paxinos and Franklin (1997). The numbers to the right are the millimeters from the bregma. The open square represents the location of the microinjection cannula tips of the vehicle B and WAY100635-microinjection group.

Figure S2

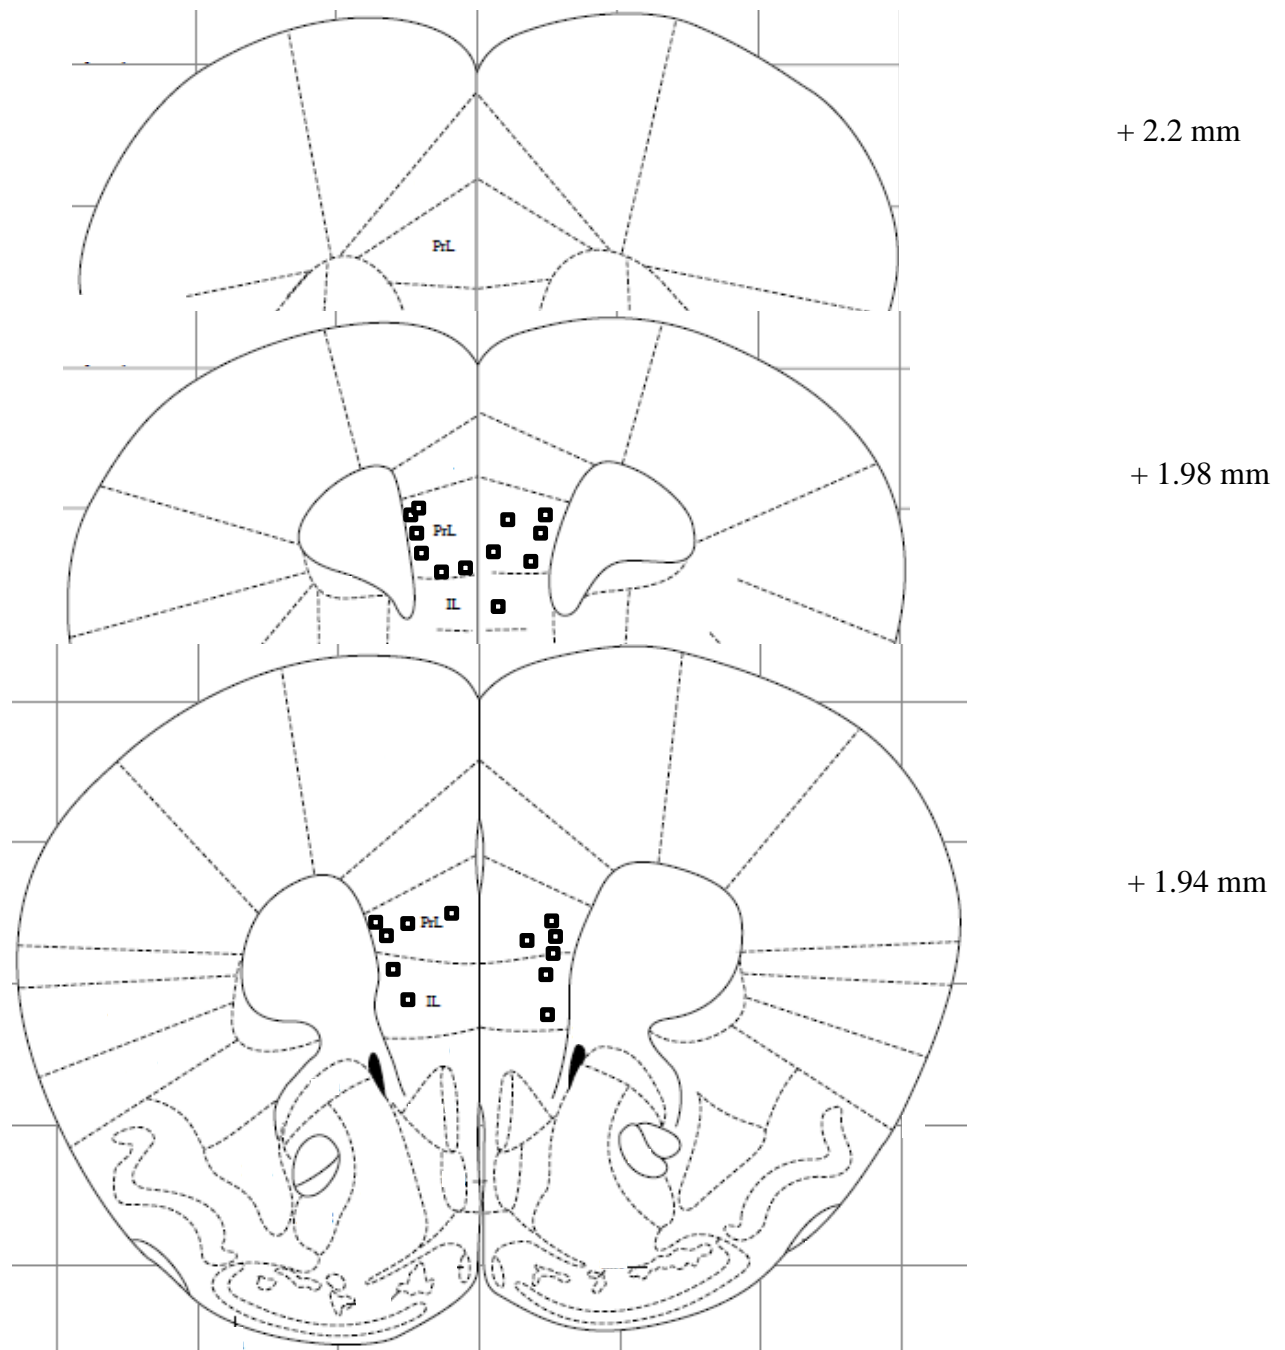

**Location of the microinjection cannula tips in the mPFC included in the analyses of the data illustrated in Fig. 1F.**

The line drawings are from Paxinos and Franklin (1997). The numbers to the right are the millimeters from the bregma. The open square represents the location of the microinjection cannula tips of the vehicle B and WAY100635-microinjection group.

Figure S3

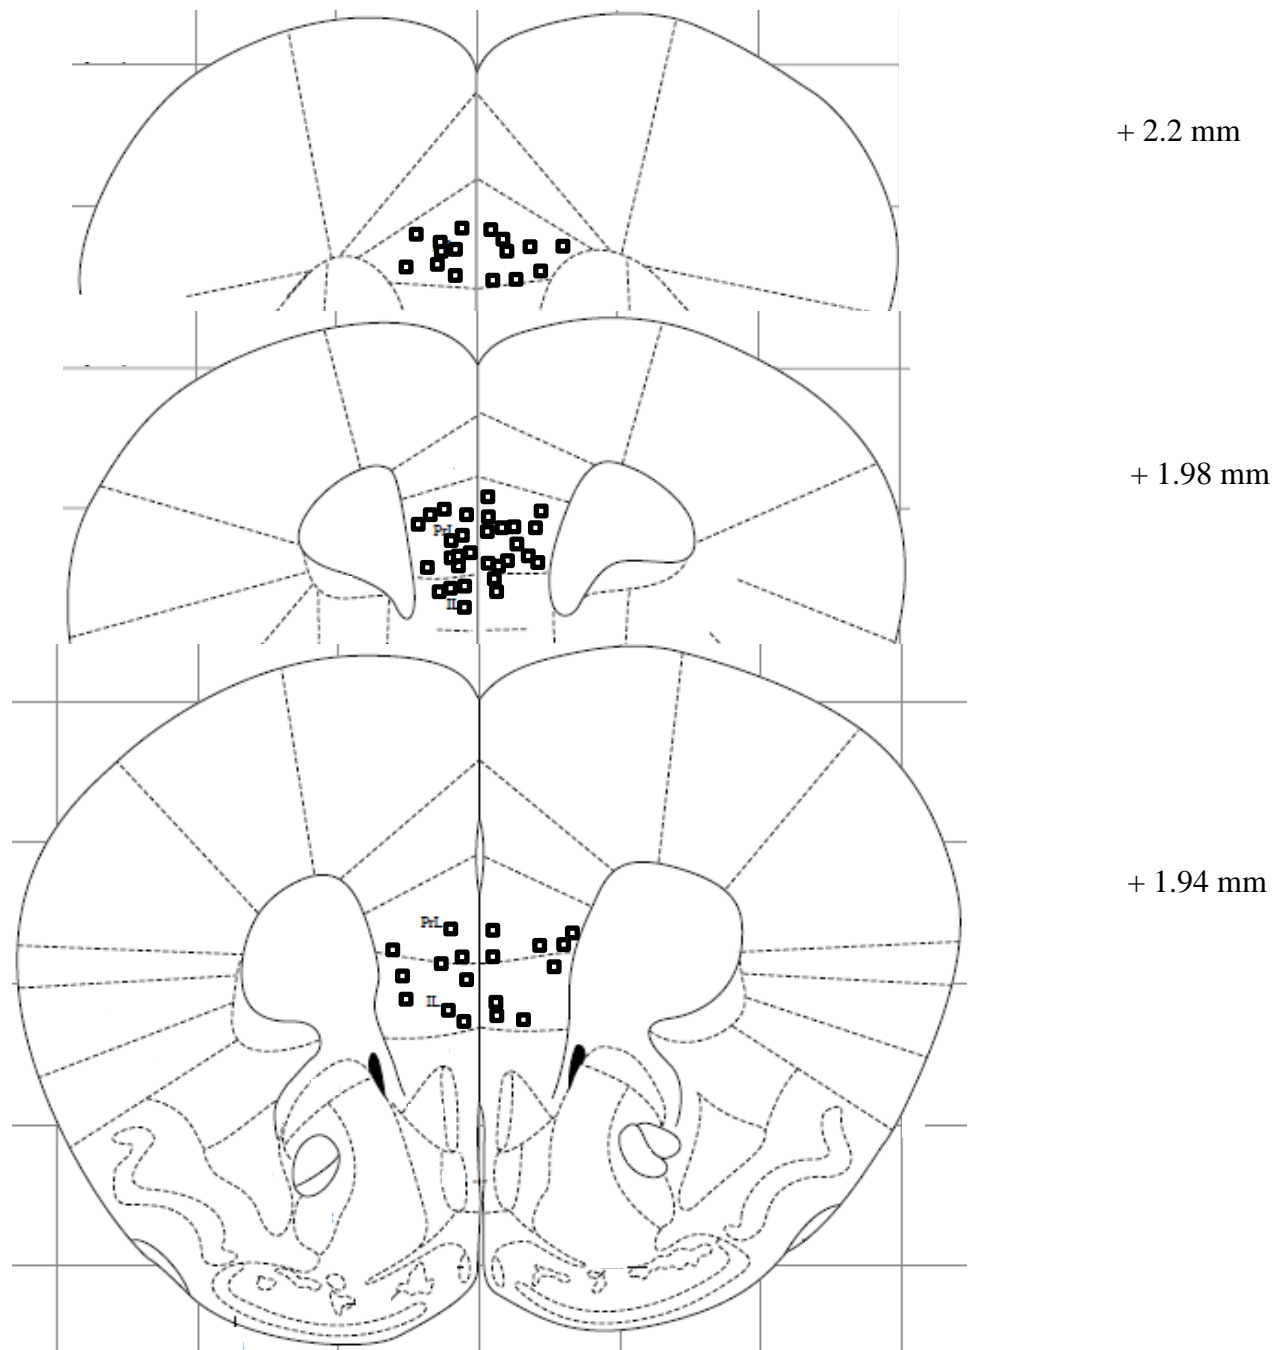

**Location of the microinjection cannula tips in the mPFC included in the analyses of the data illustrated in Fig. 2E.**

The line drawings are from Paxinos and Franklin (1997). The numbers to the right are the millimeters from the bregma. The open square represents the location of the microinjection cannula tips of the vehicle B and WAY100635-microinjection group.

Figure S4

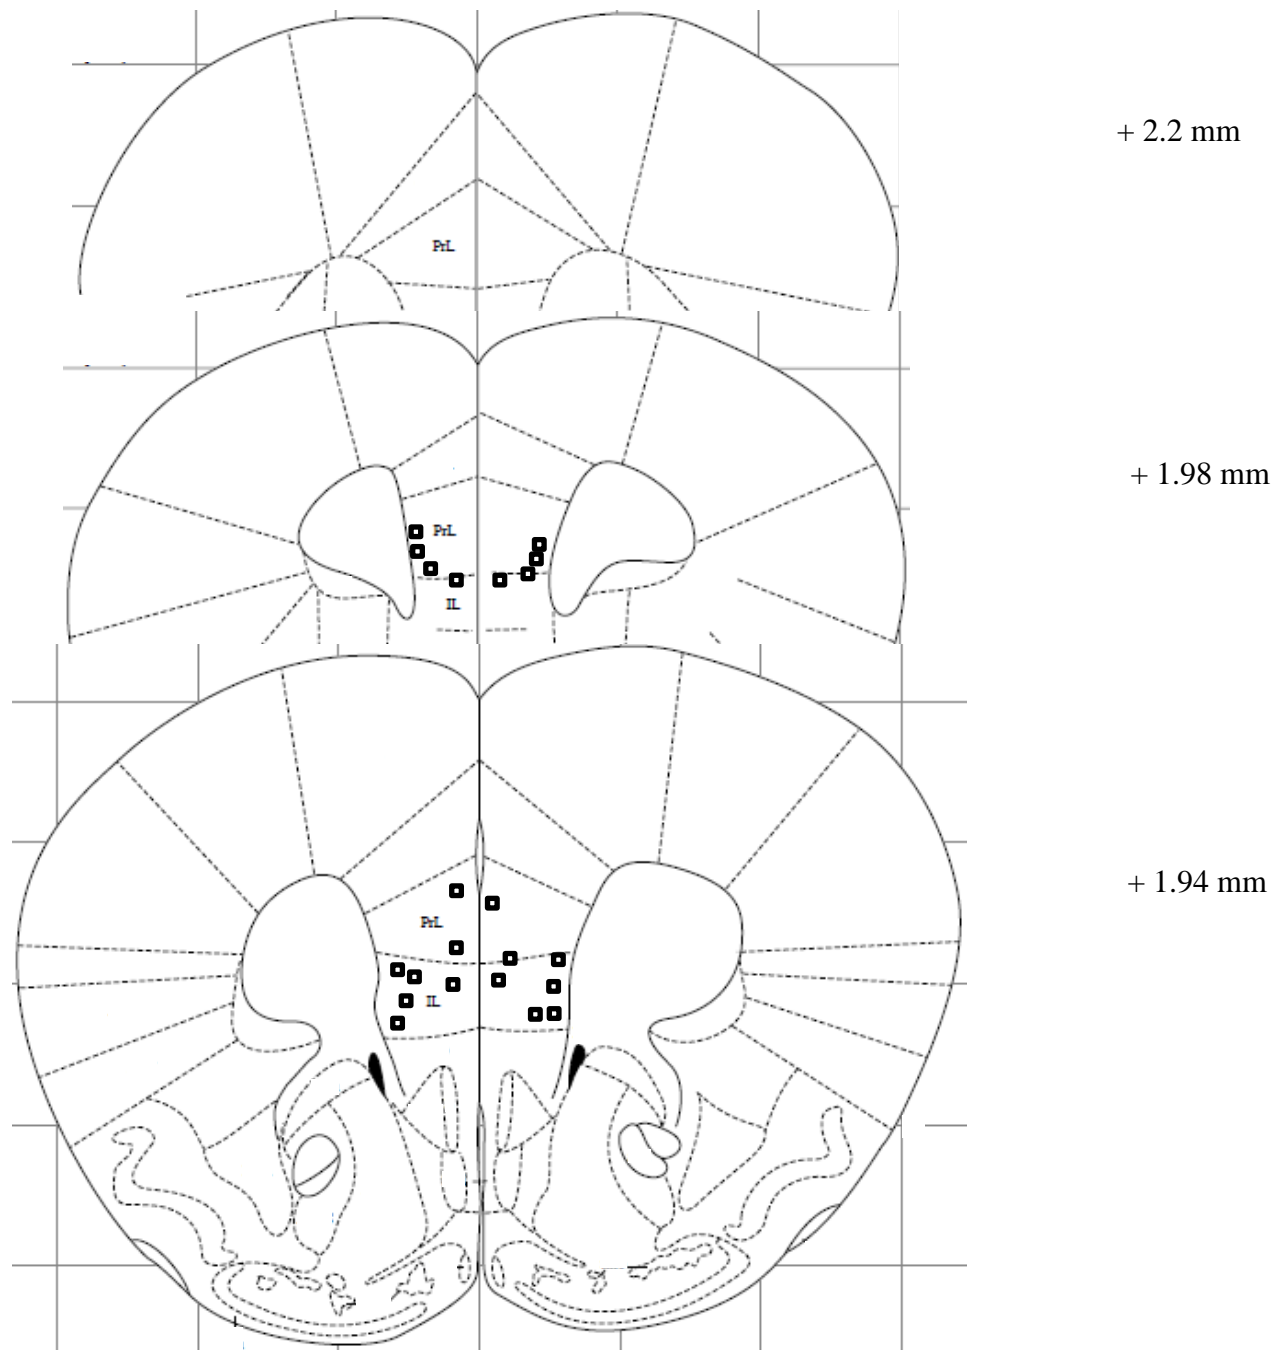

**Location of the microinjection cannula tips in the mPFC included in the analyses of the data illustrated in Fig. 2F.**

The line drawings are from Paxinos and Franklin (1997). The numbers to the right are the millimeters from the bregma. The open square represents the location of the microinjection cannula tips of the vehicle B and WAY100635-microinjection group.



Figure S5

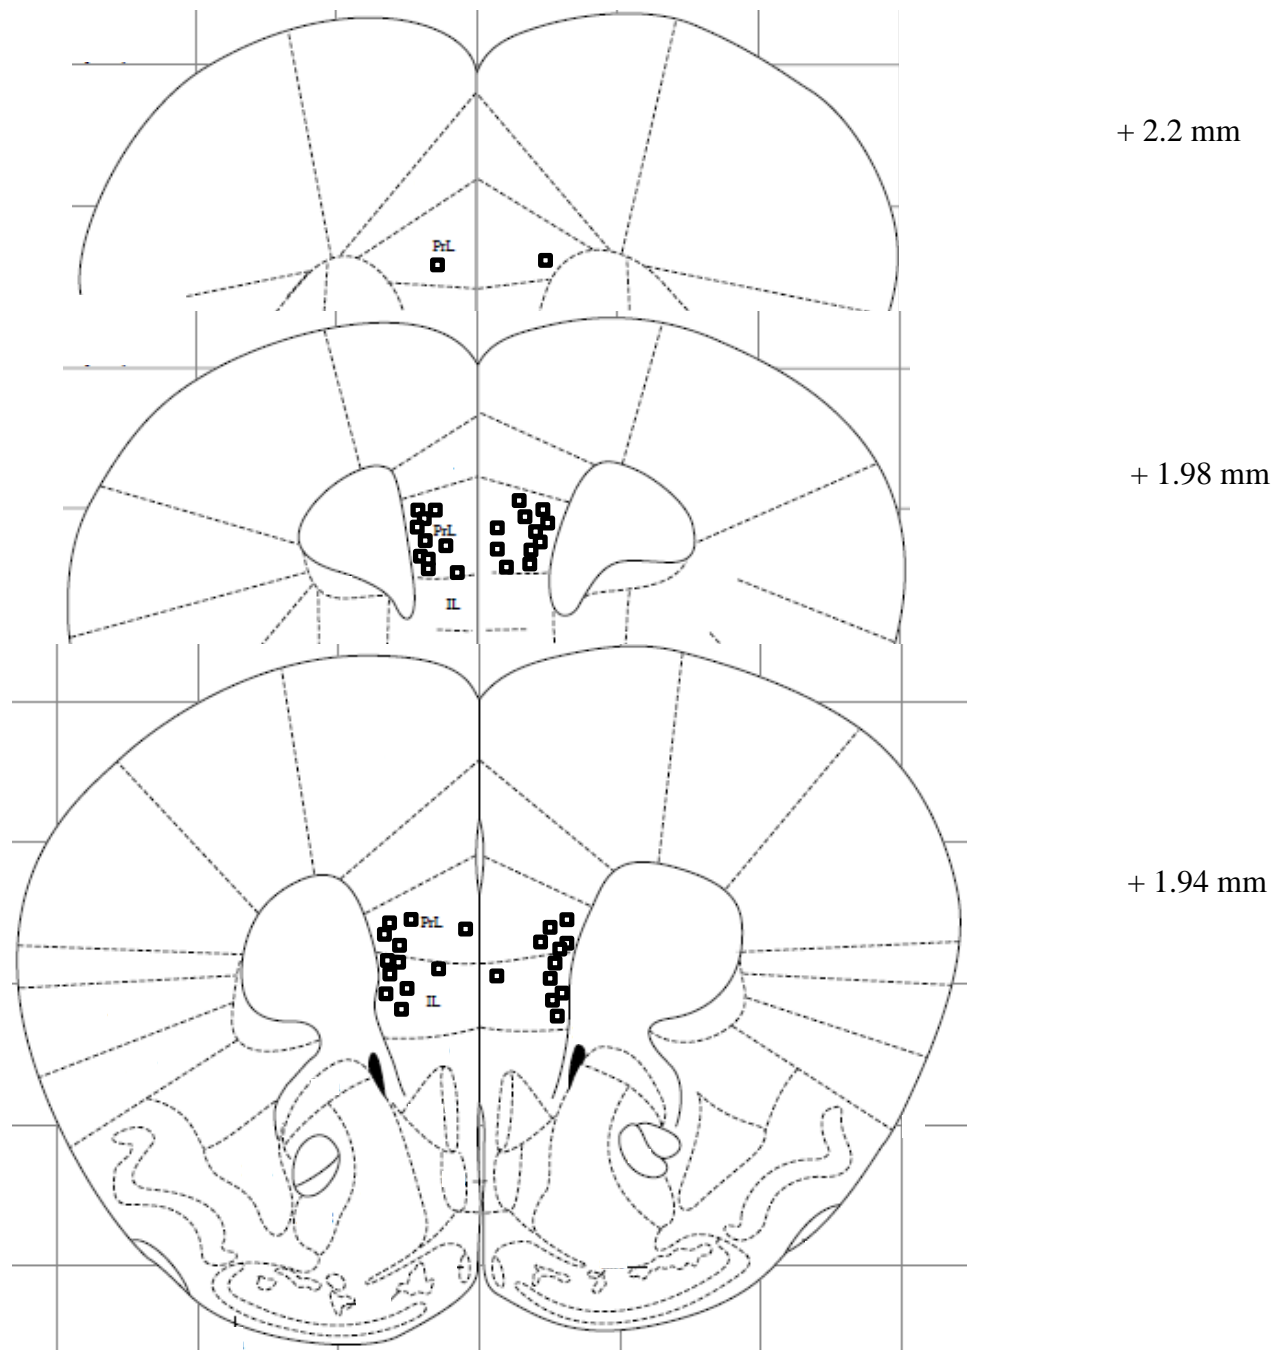

**Location of the microinjection cannula tips in the mPFC included in the analyses of the data illustrated in Fig. 2J.**

The line drawings are from Paxinos and Franklin (1997). The numbers to the right are the millimeters from the bregma. The open square represents the location of the microinjection cannula tips of the vehicle B and 8-OH-DPAT-microinjection group.

Figure S6

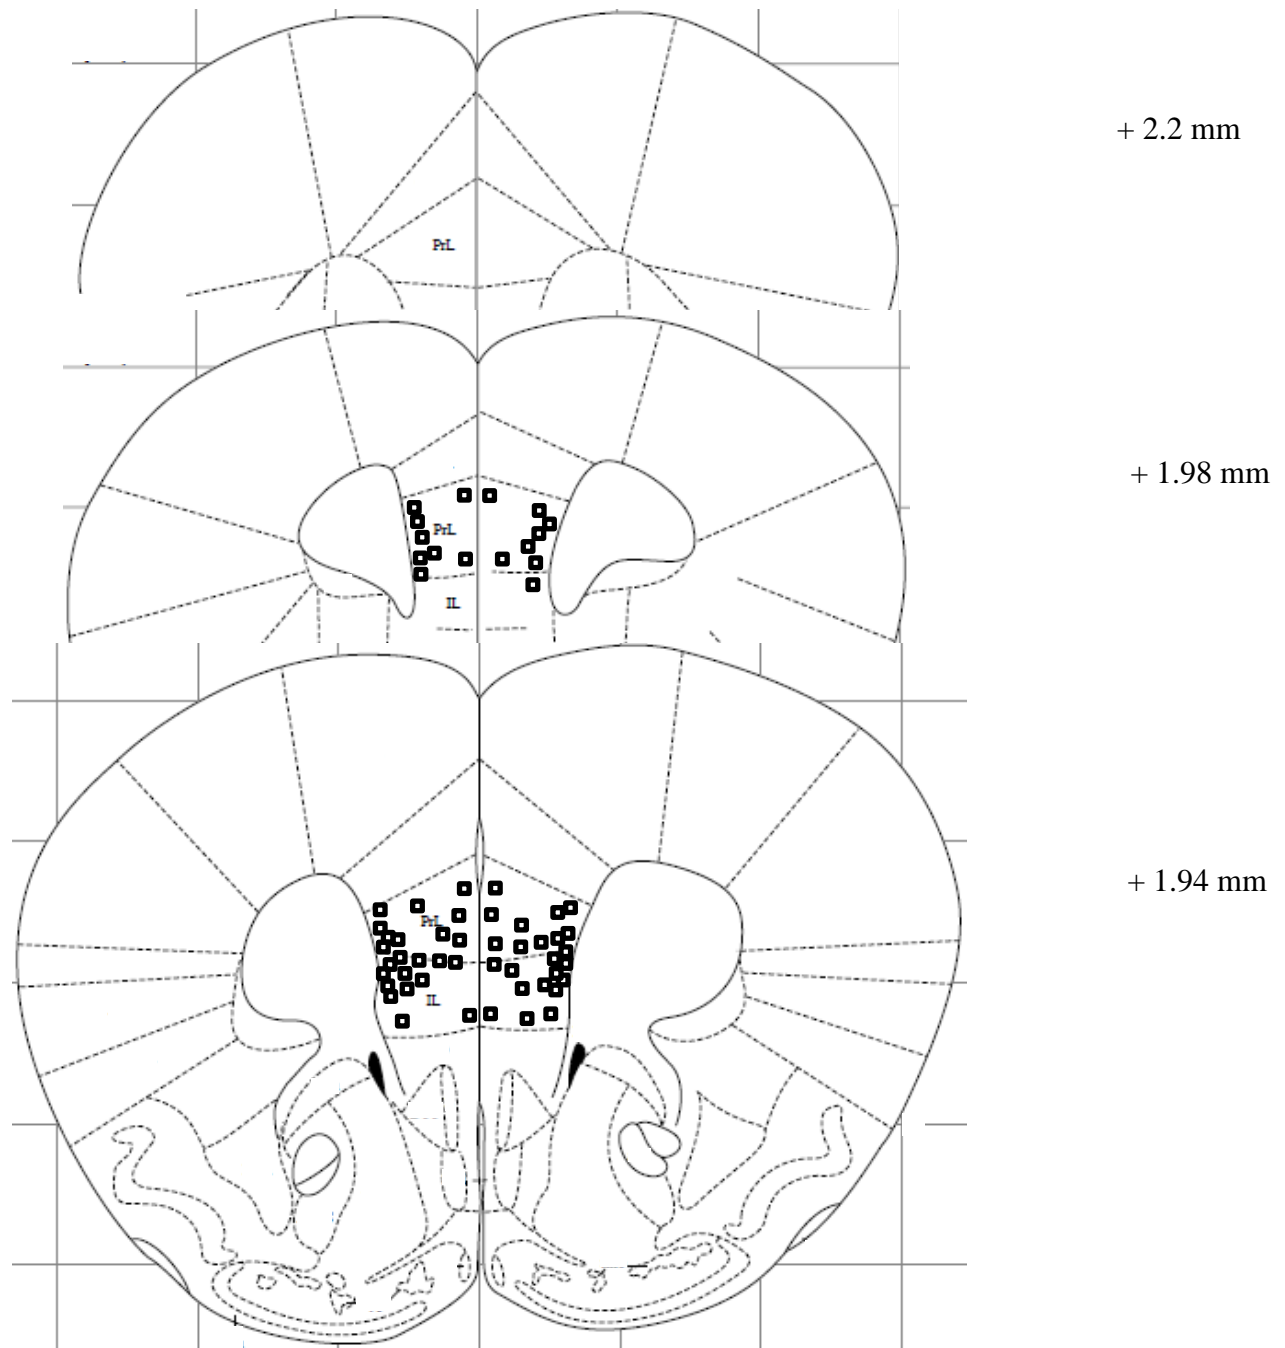

**Location of the microinjection cannula tips in the mPFC included in the analyses of the data illustrated in Fig. 2K.**

The line drawings are from Paxinos and Franklin (1997). The numbers to the right are the millimeters from the bregma. The open square represents the location of the microinjection cannula tips of the vehicle B, 8-OH-DPAT and WAY100635-microinjection group.

Figure S7

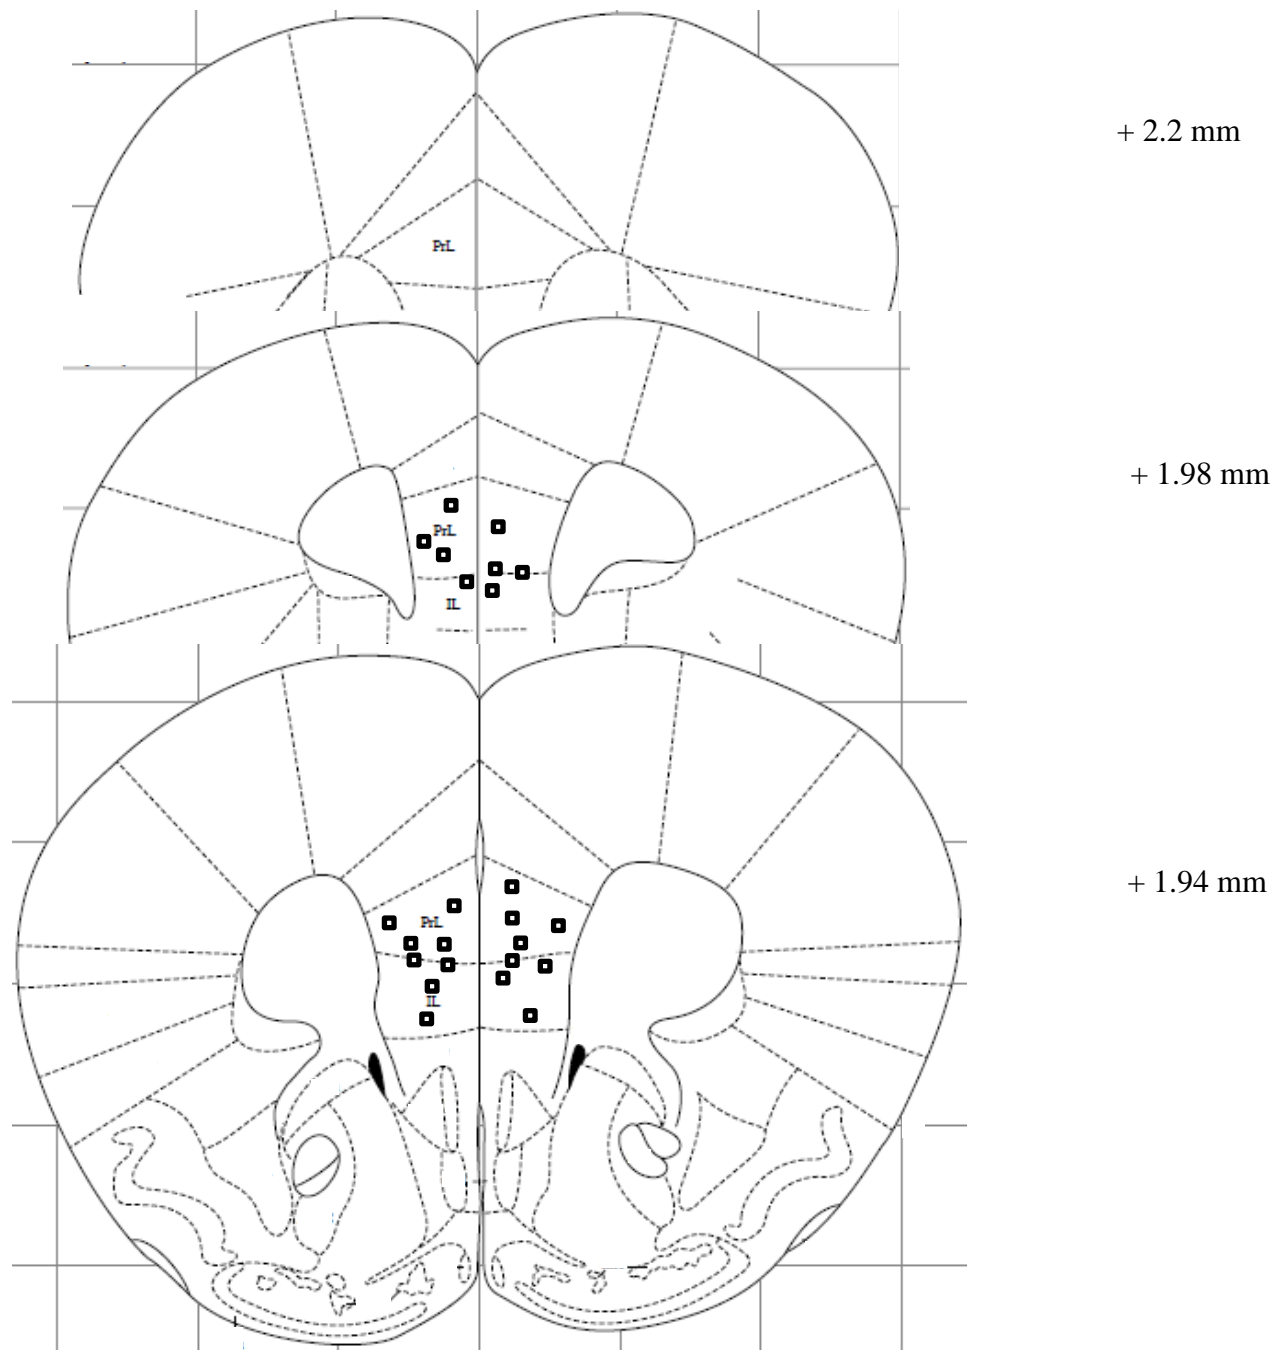

**Location of the microinjection cannula tips in the mPFC included in the analyses of the data illustrated in Fig. 2L.**

The line drawings are from Paxinos and Franklin (1997). The numbers to the right are the millimeters from the bregma. The open square represents the location of the microinjection cannula tips of the vehicle B and 8-OH-DPAT-microinjection group.

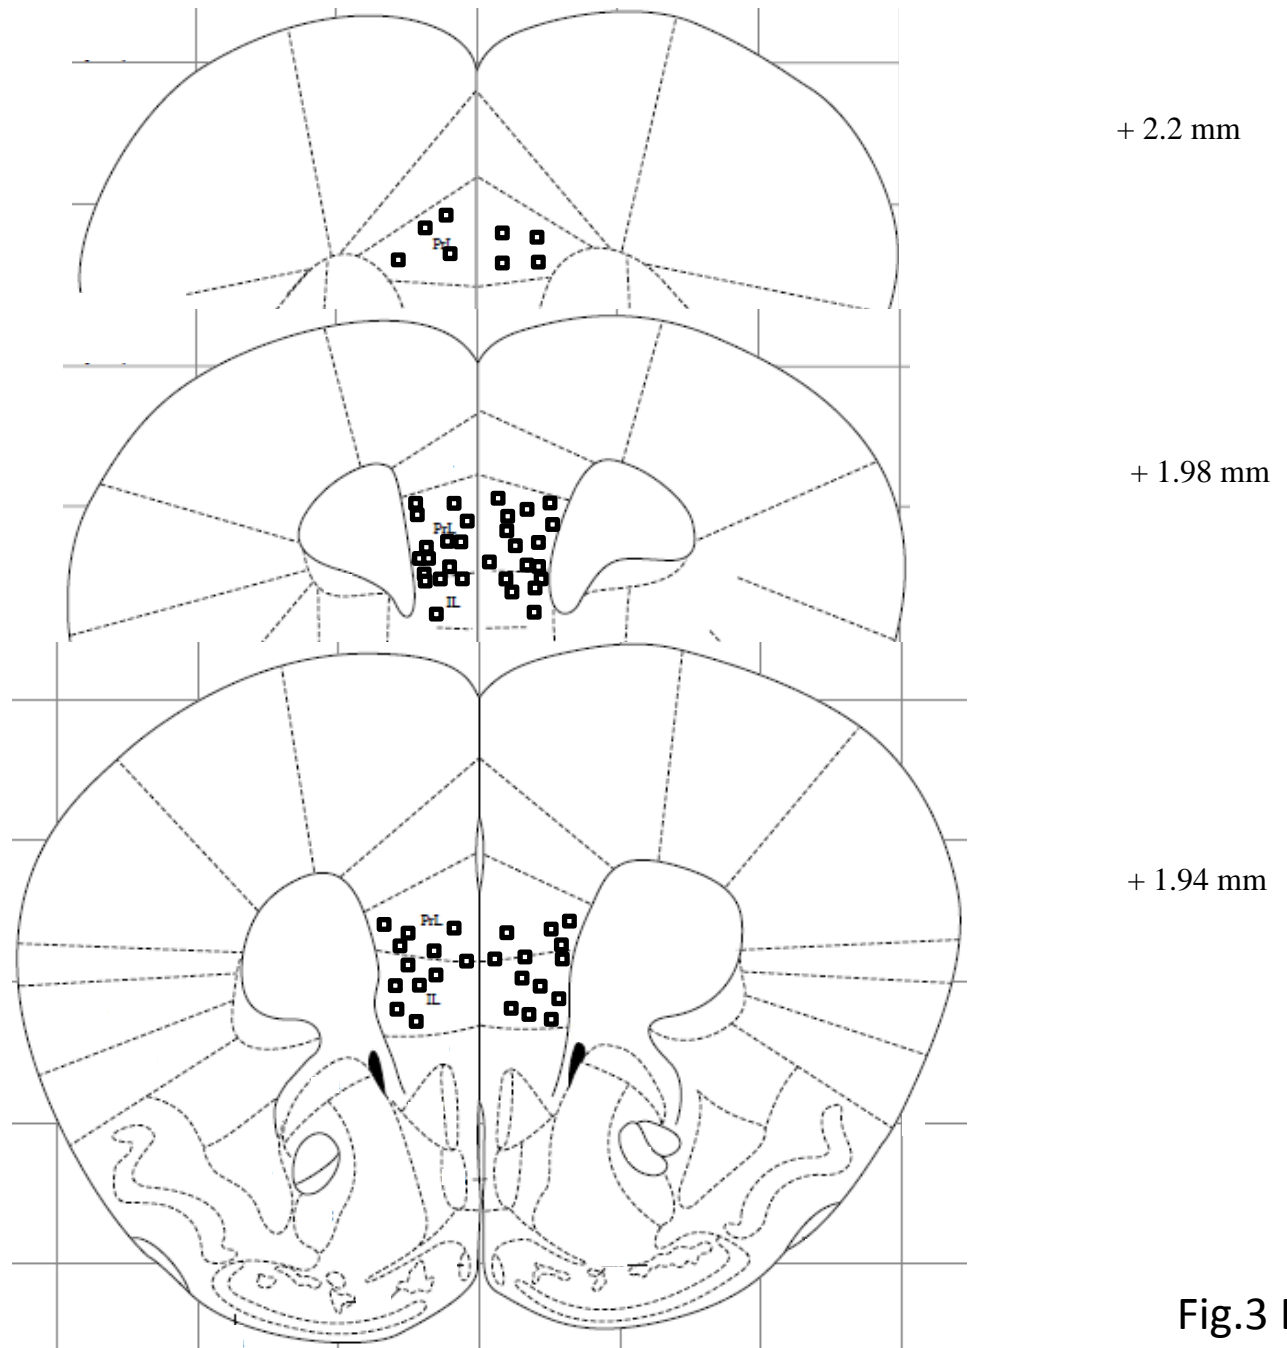

Fig.3 B

**Location of the microinjection cannula tips in the mPFC included in the analyses of the data illustrated in Fig. 3B.**

The line drawings are from Paxinos and Franklin (1997). The numbers to the right are the millimeters from the bregma. The open square represents the location of the microinjection cannula tips of the vehicle A and LY294002-microinjection group.



Figure S9

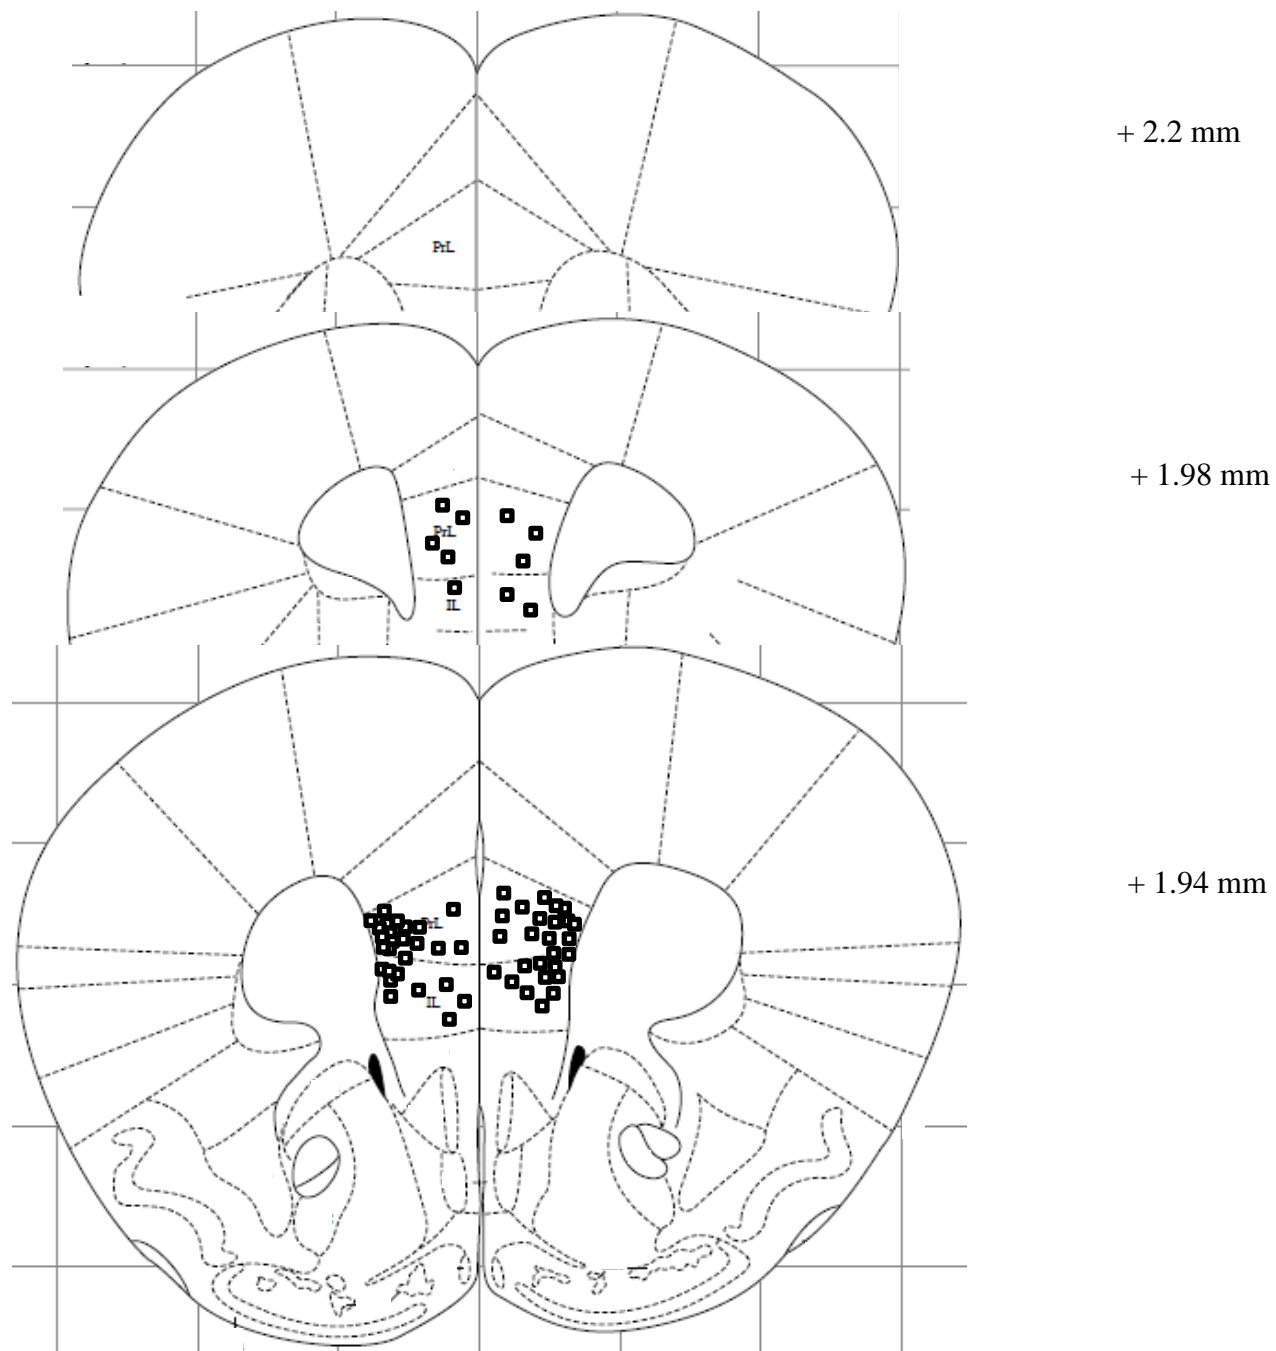

**Location of the microinjection cannula tips in the mPFC included in the analyses of the data illustrated in Fig. 3C.**

The line drawings are from Paxinos and Franklin (1997). The numbers to the right are the millimeters from the bregma. The open square represents the location of the microinjection cannula tips of the vehicle A, vehicle C, 8-OH-DPAT and LY294002-microinjection group.

Figure S10

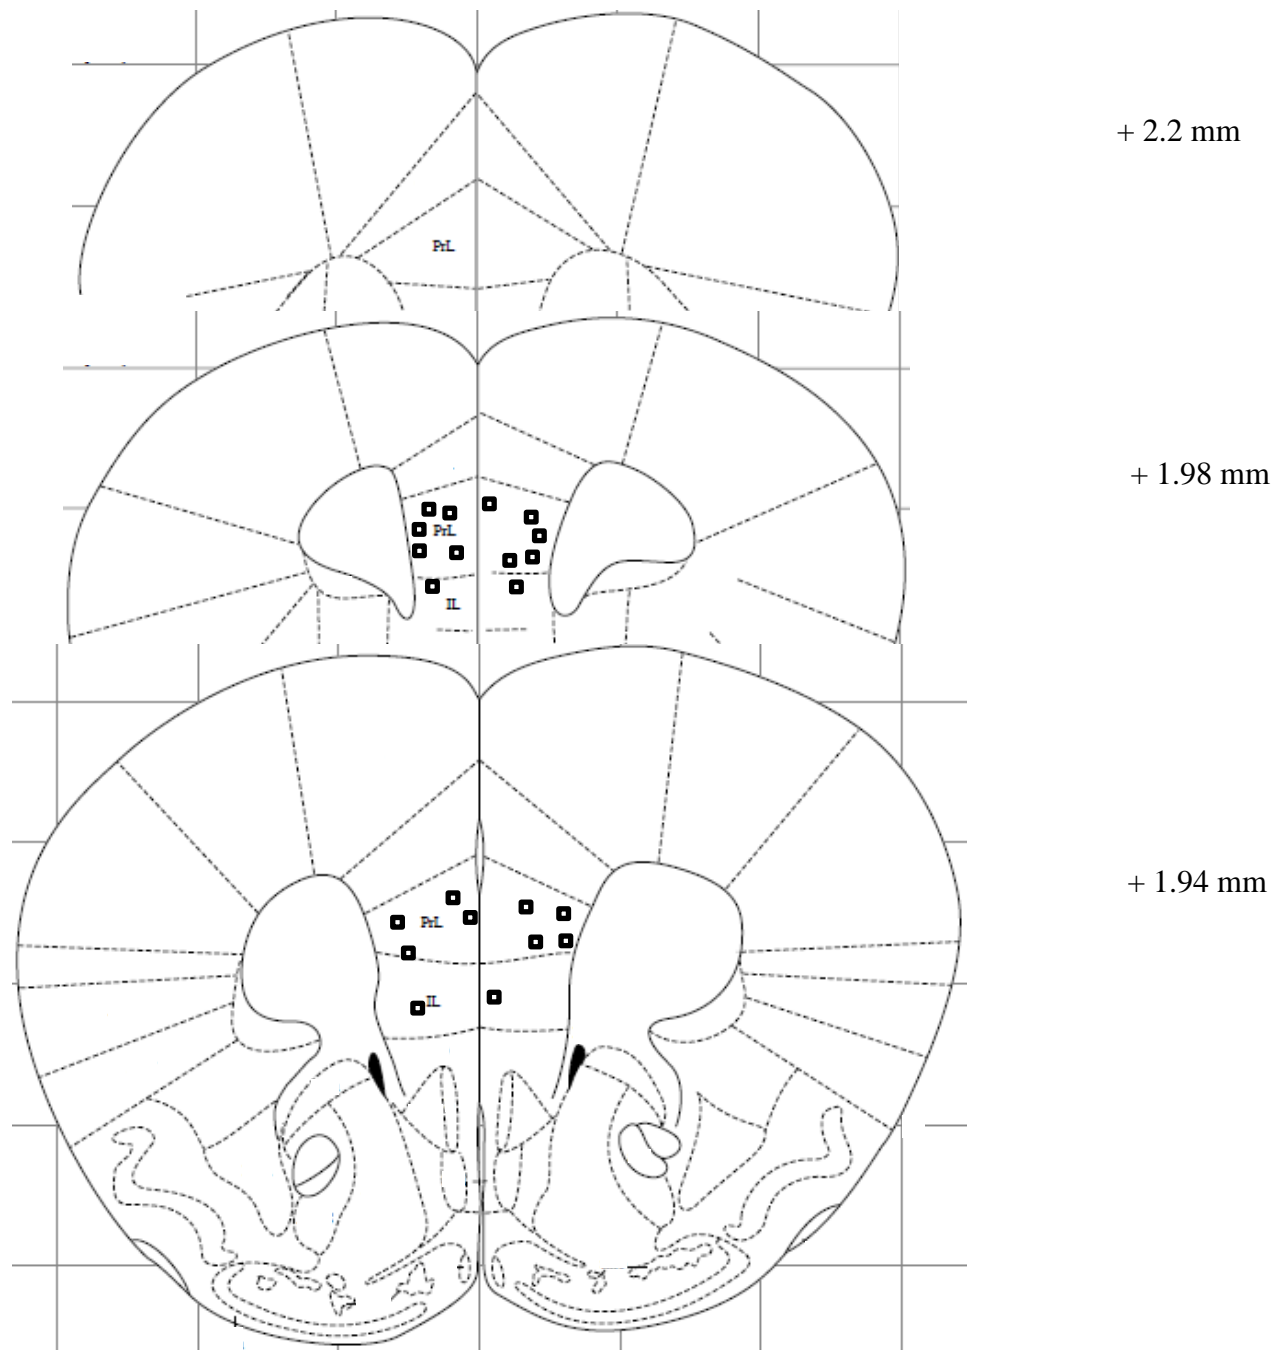

**Location of the microinjection cannula tips in the mPFC included in the analyses of the data illustrated in Fig. 3D.**

The line drawings are from Paxinos and Franklin (1997). The numbers to the right are the millimeters from the bregma. The open square represents the location of the microinjection cannula tips of the vehicle A and LY294002-microinjection group.

Figure S11

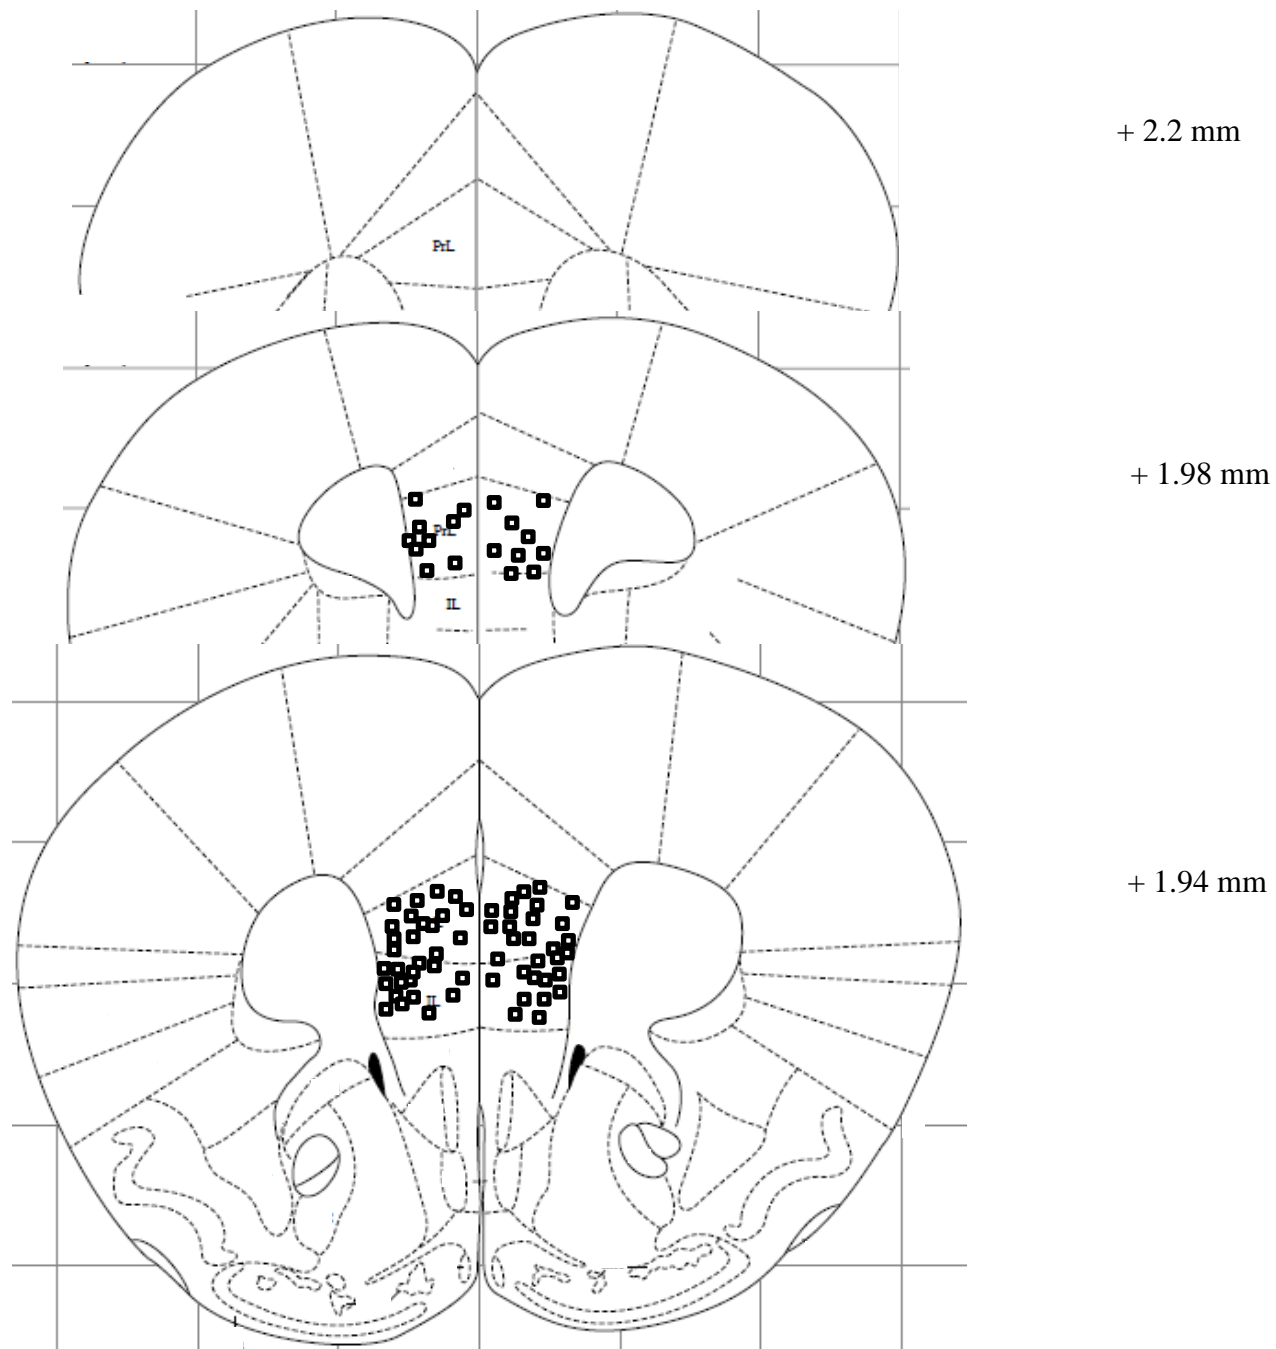

**Location of the microinjection cannula tips in the mPFC included in the analyses of the data illustrated in Figs. 5B and 5D.**

The line drawings are from Paxinos and Franklin (1997). The numbers to the right are the millimeters from the bregma. The open square represents the location of the microinjection cannula tips of the vehicle A and rapamycin-microinjection group.

Figure S12

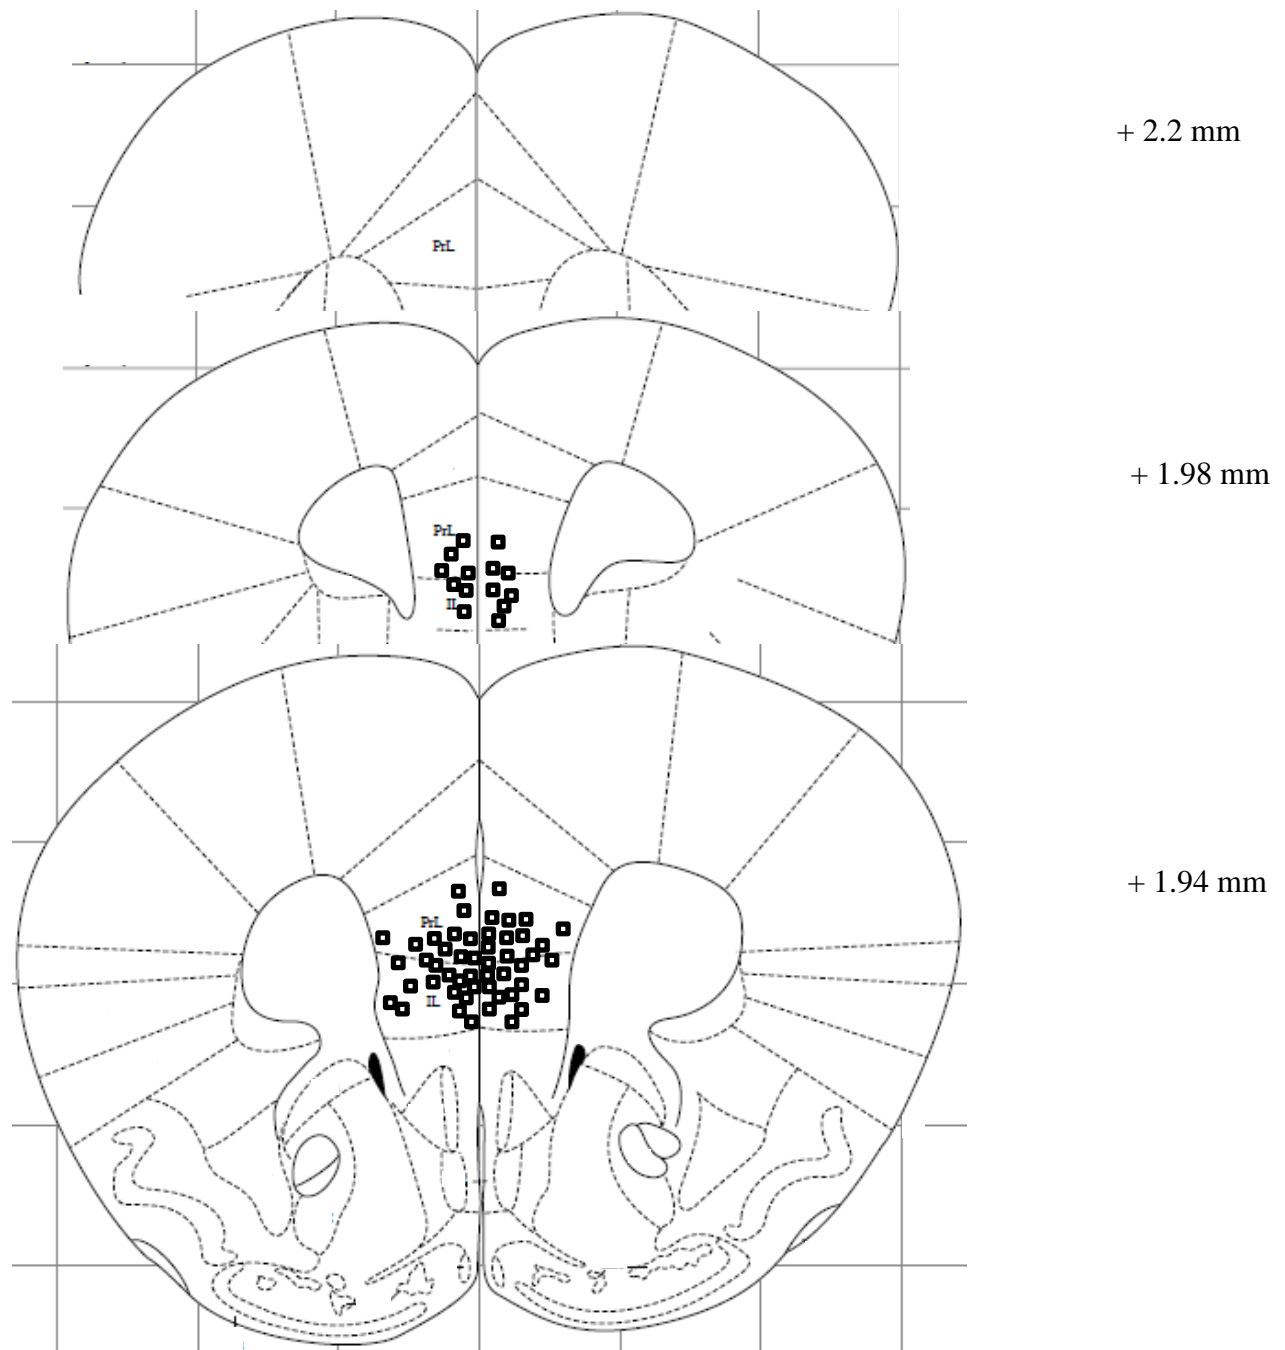

**Location of the microinjection cannula tips in the mPFC included in the analyses of the data illustrated in Fig. 5C.**

The line drawings are from Paxinos and Franklin (1997). The numbers to the right are the millimeters from the bregma. The open square represents the location of the microinjection cannula tips of the vehicle A, vehicle C, 8-OH-DPAT and rapamycin-microinjection group.



Figure S13

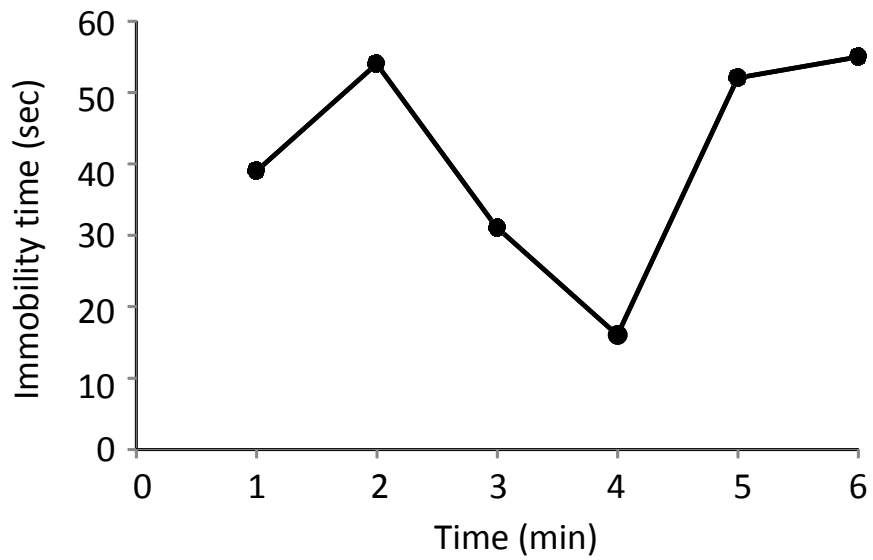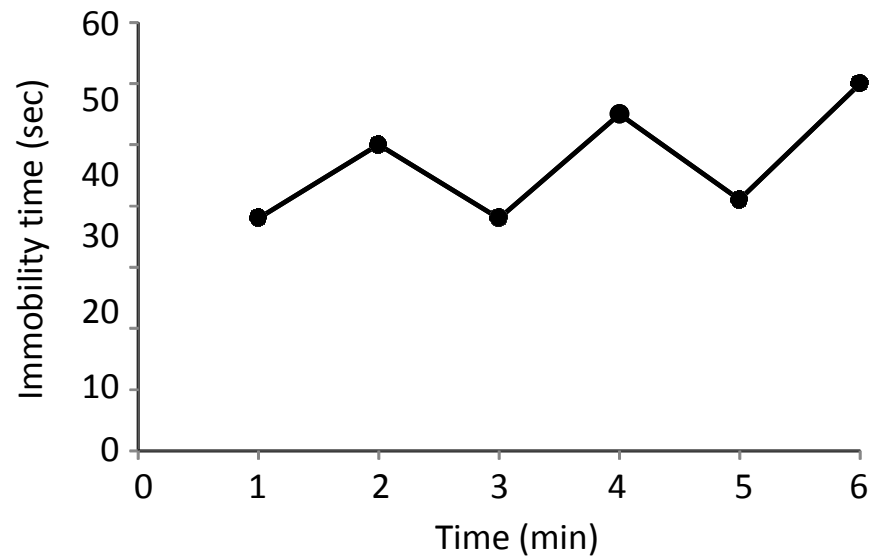

**Representative time course of immobility time over the 6 min in the forced swimming test in Fig. 1B**

The time spent immobile of two mice treated with vehicle A over the 6 min in Fig. 1B are shown.
